# Supplementary material for: HPV Infection Profiles among People Living with HIV and HPV Vaccine Acceptance among Individuals with Different HIV Infection Statuses in China: A Systematic Meta-Analysis
Source: Vaccines (Basel). 2023 Oct 19;11(10):1614. doi: 10.3390/vaccines11101614 (PMC10610837; doi:10.3390/vaccines11101614)
Supplement: Supplementary file 1 [file vaccines-11-01614-s001.zip › Supplementary Materials File S2.xlsx]

## Sheet: HPV infection rate
ID	Year	Language	First Author-Chinese	First Author-English	Title	Journal	Sample Source	Sampling Time	Sample Population	Sample Collection	Sample Site	Detection Methods	HPV subtypes	All subjects	HPV-infected patients	HR-HPV	LR-HPV	Single-infection	Multi-infection	Score	Item1	Item2	Item3	Item4	Item5	Item6	Item7	Item8	Item9	Item10	Item11
1	2022	Chinese	张静	Jing Zhang	台州市男男性行为者HIV感染和新型毒品使用与人乳头瘤病毒感染相关分析	Chinese Journal of Epidemiology	Taizhou-Zhejiang province	2016.8-2019.6	Male	Anal Swab	Anal	HPV GenoArray Test Kit (Hybribio Ltd., Guangdong, China)	21	345	229					10	1	1	1	1	1	1	1	1	0	1	1
2	2021	Chinese	付丽华	Lihua Fu	HIV感染女性宫颈癌筛查结果分析	China Medical Herald	Beijing	2018.1-2020.10	Female	Exfoliated Cervical Cells	Cervical	Polymerase Chain Reaction assay by the flow-through hybridisation technique	21	137	52	49	8			9	1	1	1	1	1	1	0	1	0	1	1
3	2021	Chinese	蒙华	Hua Meng	广西地区2013～2019年HIV感染女性宫颈癌筛查结果及分析	Journal of Practical Gynecologic Endocrinology	Guangxi province	2013-2019	Female	Exfoliated Cervical Cells	Cervical	Polymerase Chain Reaction (PCR)	-	100	34					8	1	1	1	1	1	1	0	1	0	1	0
4	2020	Chinese	万建玉	Jianyu Wan	深圳地区女性HIV合并宫颈HPV感染现状调查及临床干预的相关性研究	Chinese Journal of Human Sexuality	Shenzhen-Guangdong province	2017.1.1-2018.2.1	Female	Exfoliated Cervical Cells	Cervical	Fluorescent Quantitative PCR	-	550	298	194			122	8	1	1	1	1	1	1	0	1	0	1	0
5	2018	Chinese	汤恋花	Lianhua Tang	HIV阳性孕妇的HPV感染分型状况分析	Maternal & Child Health Care of China	Guangzhou-Guangdong province	2015.1-2017.1	Female	Exfoliated Cervical Cells	Cervical	Polymerase Chain Reaction (PCR)	-	100	55				8	7	1	1	1	1	1	0	0	1	0	1	0
6	2017	Chinese	蔡秋娥	Qiue Cai	HIV阳性女性宫颈HR-HPV感染及子宫颈细胞学筛查	China Tropical Medicine	Shenzhen-Guangdong province	2013.1-2016.9	Female	Exfoliated Cervical Cells	Cervical	Fluorescent Quantitative PCR	8 HR-HPV	206	-	69				9	1	1	1	1	1	1	0	1	0	1	1
7	2017	Chinese	楼俊晓	Junxiao Lou	女性人类免疫缺陷病毒感染与宫颈人乳头瘤状病毒感染的相关性分析	Maternal & Child Health Care of China	Ningbo-Zhejiang province	2014.6-2016.6	Female	Exfoliated Cervical Cells	Cervical	PCR+membrane hybridization method	23	161	-	62	25		31	9	1	1	1	1	1	1	0	1	0	1	1
8	2017	Chinese	万建玉	Jianyu Wan	女性感染HIV与宫颈HR-HPV感染的相关性分析	Practical Clinical Medicine	Shenzhen-Guangdong province	2013.1-2015.12	Female	Exfoliated Cervical Cells	Cervical	Fluorescent Quantitative PCR	8 HR-HPV	203	-	42				9	1	1	1	1	1	1	0	1	0	1	1
9	2013	Chinese	郭晓峰	Xiaofeng Guo	HIV/AIDS与人乳头瘤病毒感染及宫颈病变的相关性研究	Progress in Obstetrics and Gynecology	Guangzhou-Guangdong province	2009.4-2012.7	Female	Exfoliated Cervical Cells	Cervical	Fluorescent Quantitative PCR	8 HR-HPV	166	-	64				9	1	1	1	1	1	1	0	1	0	1	1
10	2013	Chinese	罗丽丽	Lili Luo	HIV阳性女性患者P16~(INK4a)蛋白表达与HPV感染相关性分析	Journal of Chinese Oncology	Hubei and Henan province	2009.9-2010.6	Female	Exfoliated Cervical Cells	Cervical	Genetic chip HPV DNA genotyping detection	23	182	67	36	31	44	23	6	1	0	1	1	1	0	0	0	0	1	1
11	2012	Chinese	张永喜	Yongxi Zhang	HIV阳性妇女子宫颈感染HPV状况分析	Chinese Journal of Obstetrics and Gynecology	Hubei province	2009.9-2011.5	Female	Exfoliated Cervical Cells	Cervical	Polymerase Chain Reaction assay by the flow-through hybridisation technique	23	293	130	117	41		54	9	1	1	1	1	1	1	0	1	0	1	1
12	2011	Chinese	张永喜	Yongxi Zhang	人类免疫缺陷病毒感染妇女人乳头状瘤病毒感染状况及危险因素分析	Chinese Journal of Clinical Infectious Diseases	Wuhan-Hubei province	2009.9-2010.5	Female	Exfoliated Cervical Cells	Cervical	Polymerase Chain Reaction assay by the flow-through hybridisation technique	23	178	68	63			24	9	1	1	1	1	1	1	0	1	0	1	1
13	2022	English		Rufei Duan	Prevalence and risk factors for anogenital HPV infection and neoplasia among women living with HIV in China	Sexually transmitted infections	Kunming-Yunnan province	2019-2020	Female	Exfoliated Cervical Cells	Cervical	Real-time Fluorescent Quantitative PCR	15	409	140	125				9	1	1	1	1	1	1	0	1	0	1	1
										Anal Swab	Anal		15	409	142	124				9	1	1	1	1	1	1	0	1	0	1	1
14	2022	English		Jing Zhang	Increased CD4(+) T cell count is associated with lower anal human papillomavirus prevalence among HIV-positive male cohort in Taizhou, China：a cross-sectional study	BMC infectious diseases	Taizhou-Zhejiang province	2016-2019	Male	Anal Swab	Anal	HPV GenoArray Test Kit (Hybribio Ltd., Guangdong, China)	21	766	373	309	173			9	1	1	1	1	1	1	0	1	0	1	1
15	2021	English		Min Feng	Role of Epstein-Barr Virus and Human Papillomavirus Coinfection in Cervical Intraepithelial Neoplasia in Chinese Women Living With HIV	Frontiers in cellular and infection microbiology	Kunming-Yunnan province	2019.1-2019.12	Female	Exfoliated Cervical Cells	Cervical	Sansure PCR HPV test	15 HR-HPV	176	-	59				10	1	1	1	1	1	1	1	1	0	1	1
16	2020	English		Yaping Qiao	High-risk Human Papillomavirus Infection and Associated Factors among HIV-positive Women in High HIV-burden Areas of China	Biomedical and environmental sciences : BES	Yunan, Gaungxi, Xinjiang	2015.5-8	Female	Exfoliated Cervical Cells	Cervical	HPV genotyping assay based on nextgeneration sequencing and multiplex polymerase chain reaction + DNA-chip technology kit (Yaneng Bioscience [Shenzhen] Co. Ltd, Shenzhen, China)	14 HR-HPV	695	-	180				10	1	1	1	1	1	1	1	1	0	1	1
17	2019	English		X. Liu	Prevalence and genotypes of anal human papillomavirus infection among HIV-positive vs. HIV-negative men in Taizhou, China	Epidemiology and infection	Taizhou-Zhejiang province	2016.8-2017.10	Male	Anal Swab	Anal	HPV GenoArray Test Kit (Hybribio Ltd., Guangdong, China)	21	160	82	75				9	1	1	1	1	1	1	0	1	0	1	1
18	2019	English		Qian Wang	Human papillomavirus infection and associated factors for cervical intraepithelial neoplasia in women living with HIV in China:a cross-sectional study	Sexually transmitted infections	Guangxi province	2014.3-8	Female	Exfoliated Cervical Cells	Cervical	PCR-reverse dot blot hybridisation, Hybribio	18	183	80					9	1	1	1	1	1	1	0	1	0	1	1
19	2016	English		Xiangwei Li	Anal HPV/HIV co-infection among Men Who Have Sex with Men：a cross-sectional survey from three cities in China	Scientific reports	Chengdu, Xi'an, Taiyuan	-	Male	Anal Swab	Anal	Hybribio 37 HPV GenoArray Diagnostic Kit Test	37	104	86	73		36	50	5	1	1	0	0	1	0	0	0	0	1	1
20	2016	English		Yu Qin	Evaluation of human papillomavirus detection by Abbott m2000 system on samples collected by FTA Elute (TM) Card in a Chinese HIV-1 positive population	Journal of Clinical Virology	Kunming-Yunnan province	2013.5	Female	Exfoliated Cervical Cells	Cervical	Abbott RealTime High Risk HPV assay	14 HR-HPV	291	-	101				10	1	1	1	1	1	1	1	1	0	1	1
21	2015	English		Zhen Li	Anal Human Papillomavirus Genotyping among HIV-Positive Men Who Have Sex with Men in Xi'an, China	PloS one	Xi'an-Shaanxi province	2014.4-7	Male	Anal Swab	Anal	Hybribio HPV DNA Test	37	193	191	183	154			10	1	1	1	1	1	1	1	1	0	1	1
22	2014	English		Honggyun Zhang	The diversity of human papillomavirus infection among human immunodeficiency virus-infected women in Yunnan, China Other viruses (e.g. pox, papilloma, parvo, reoviridae)	Virology Journal	Mangshi-Yunnan province	-	Female	Exfoliated Cervical Cells	Cervical	HPV genotyping kit	23	301	131					7	1	1	0	0	1	1	0	1	0	1	1
23	2013	English		Yifei Hu	Anal human papillomavirus infection among HIV-infected and uninfected men who have sex with men in Beijing, China	Journal of acquired immune deficiency syndromes (1999)	Beijing	2010.1-2011.7	Male	Anal Swab	Anal	Tellgenplex HPV DNA Test	-	212	174					8	1	1	1	1	1	1	0	1	0	1	0
24	2011	English		Yongxi Zhang	Epidemiologic risk profile of human papillomavirus infections in human immunodeficiency virus-positive Chinese women	Japanese journal of infectious diseases	Hubei province	2009.9-12	Female	Exfoliated Cervical Cells	Cervical	HPV DNA was detected by polymerase chain reaction (PCR)	23	200	73	67				9	1	1	1	1	1	1	0	1	0	1	1

## Sheet: HPV vaccine acceptance
ID	Year	Language	First Author-Chinese	First Author-English	Title	Journal	Investigation Form	Sample Source	Investigation time	Sample Population	Issued Questionnaires	Effective Questionnaire	Unvaccinated Subjects	Willing to Vaccination	Score	Item1	Item2	Item3	Item4	Item5	Item6	Item7	Item8	Item9	Item10	Item11
1	2023	Chinese	胡峰	Feng Hu	齐齐哈尔市312名女医学生HPV疫苗接种意愿及影响因素	Chinese Journal of School Doctor	Online	Qiqihaer-Heilongjiang province	2020.12-2021.1	Female College Student	312	312	256	192	8	1	1	1	1	1	1	0	0	0	1	1
2	2022	Chinese	胡淑怡	Shuyi Hu	女大学生对HPV及其疫苗认知情况调查研究	Chinese Journal of Woman and Child Health Research	Offline	Shanghai	2020.9-12	Female College Student	2000	1992	1825	1452	8	1	1	1	1	1	1	0	0	0	1	1
3	2022	Chinese	李骥	Ji Li	淮安地区20岁以下女性HPV疫苗接种情况及认知度调查	Practical Preventive Medicine	Offline	Huai‘an-Jiangsu province	2020.12.1-6	Female (12-20)	400	364	312	236	11	1	1	1	1	1	1	1	1	1	1	1
4	2022	Chinese	石晶	Jing Shi	通州区男大学生HPV疫苗认知及接种意愿调查	Journal of Preventive Medicine	Online	Beijing	2019.9-11	Male college student	997	935	935	360	8	1	1	1	1	1	1	0	0	0	1	1
5	2022	Chinese	吴银姬	Yinji Wu	溧水区成年男性HPV疫苗的认知和接种意愿影响因素研究	Jiangsu Healthcare Administration	Online	Nanjing-Jiangsu province	2021.5-6	Adult Male	300	288	288	140	8	1	1	1	1	1	1	0	0	0	1	1
6	2022	Chinese	张红	Hong Zhang	基于TAM-TPB模型的民办高校男大学生HPV疫苗认知水平和接种意愿调查	Occupation and Health	Offline	Tianjin	2021.4	Male college student	447	421	421	99	9	1	1	1	1	1	1	1	0	0	1	1
7	2021	Chinese	陈慧	Hui Chen	西部地区大学生人乳头瘤病毒疫苗的接种现状及其对人乳头瘤病毒和疫苗的认知、态度及影响因素	Acta Academiae Medicinae Sinicae	Online	Chengdu-Sichuan province	2020.2-4	Adult College Student	934	881	865	568	8	1	1	1	1	1	1	1	0	0	1	0
										Male			419	389
										Female			446	179
8	2021	Chinese	邓景景	Jingjing Deng	苏州市大学女生子宫颈癌防控认知调查	Journal of Public Health and Preventive Medicine	Online	Suzhou-Jiangsu province	2019.11.27-12.30	Female College Student	2169	2169	1996	1755	6	1	0	1	1	1	1	0	0	0	1	0
9	2021	Chinese	冯澜	Lan Feng	南宁市部分高校女大学生对HPV疫苗的认知及接种意愿调查	Chinese Primary Health Care	Online	Nanning-Guangxi province	2020.3-4	Female College Student	350	337	264	150	8	1	0	1	1	1	1	0	0	1	1	1
10	2021	Chinese	王若思	Ruosi Wang	昆明市女性人乳头瘤病毒疫苗接种意愿及影响因素分析	Maternal & Child Health Care of China	Offline	Kunming-Yunan province	2019.11-12	Female	580	545	545	424	8	1	1	1	1	1	1	0	0	1	1	0
11	2021	Chinese	杨绮妍	Qiyan Yang	海口市育龄女性HPV筛查结果分析及HPV疫苗接种意愿研究	South China Journal of Preventive Medicine	-	Haikou-Hainan province	2019.9-2020.8	Female (20-45)	3921	3476	2850	2089	4	1	1	1	0	0	0	0	0	0	1	0
12	2021	Chinese	张希	Xi Zhang	中西部地区女大学生HPV疫苗接种意愿的影响因素研究	Modern Preventive Medicine	Online	Taiyuan-Shanxi province, Chengdu-Sichuan province	2020.2-4	Female College Student	-	975	954	316	8	1	1	1	1	0	1	1	0	0	1	1
13	2021	Chinese	张肖肖	Xiaoxiao Zhang	2019年大学女生人乳头瘤病毒疫苗知晓率和接种率调查	Chinese Journal of Vaccines and Immunization	Offline	Zhejiang, Henan, Sichuan, Heilongjiang	2019.1-12	Female College Student	3007	3007	2918	1613	7	1	1	1	1	1	1	0	0	0	1	0
14	2020	Chinese	黄玲	Ling Huang	海口市0－6岁儿童母亲人乳头瘤病毒疫苗接种意愿及影响因素分析	Practical Preventive Medicine	-	Hainan proince	2018.1-2019.12	Female	962	962	910	717	5	1	1	1	0	1	0	0	0	0	1	0
15	2020	Chinese	王晓妮	Xiaoni Wang	大学生HPV认知情况对其疫苗接种意愿的影响分析	Journal of Xi'an Jiaotong University(Medical Sciences)	Offline	Xian'an-Shaanxi province	2018.10-12	College Student	1083	979	979	478	10	1	1	1	1	1	1	1	0	1	1	1
16	2020	Chinese	赵晨宇	Chenyu Zhao	内蒙古高校学生人乳头瘤病毒疫苗接种意愿和影响因素调查	Chinese Journal of Vaccines and Immunization	Offline	Inner Mongolia	2019.4-5	College Student	-	1665	1665	558	6	1	1	1	1	0	0	0	0	0	1	1
										Male			710	206
										Female			955	352
17	2019	Chinese	陈华	Hua Chen	2017年四川省疾病预防控制中心女性职工对人乳头瘤病毒及其疫苗知晓率及接种意愿调查	Journal of Preventive Medicine Information	Offline	Sichuan province	2017.12	Female	-	151	144	66	7	1	1	1	1	0	1	0	0	0	1	1
18	2019	Chinese	李亚飞	Yafei Li	厦门市男大学生HPV疫苗认知和接种意愿及影响因素	Chinese Journal of School Health	Offline	Xiamen-Fujian province	2018.3-6	Male college student	1342	1209	1209	465	8	1	1	1	1	1	1	0	0	0	1	1
19	2019	Chinese	李珍	Zhen Li	健康体检女性的人乳头瘤病毒感染现状及其相关认知的调查分析	Journal of Ningde Teachers College(Natural Science)	Offline	Fujian province	2017.5-2018.5	Female	840	837	837	535	7	1	1	1	1	1	0	0	0	0	1	1
20	2019	Chinese	任燕	Yan Ren	妇科住院患者对人乳头瘤病毒疫苗的认知及接种态度调查	Modern Practical Medicine	Offline	Ningbo-Zhejiang province	2018.9-2019.1	Female	473	473	473	304	7	1	1	1	1	1	0	0	0	0	1	1
21	2023	Chinese	吕海伟	Haiwei Lv	男性HIV感染者对HPV及疫苗的了解程度与接种意愿	Chinese Journal of AIDS & STD	Mix	Shanghai	2022.7-8	HIV-Male	433	407	340	301	9	1	1	1	1	1	1	1	0	0	1	1
22	2022	Chinese	张静	Jing Zhang	台州市男性HIV感染者HPV疫苗接种意愿及相关因素	Chinese Journal of AIDS & STD	Offline	Taizhou-Zhejiang province	2016.8-2019.6	HIV-Male	773	711	711	301	8	1	1	1	1	1	0	1	0	0	1	1
23	2023	English		Luhong Xie	Knowledge, attitude, and perception regarding HPV-related diseases and vaccination among the general public in Guizhou Province of China	Vaccine	Online	Guizhou province	2021.7-2022.6	Adult College Student	3436	3412	2542	2343	9	1	1	1	1	1	1	1	0	0	1	1
										Male			627	551
										Female			1915	1792
24	2022	English		Zhenwei Dai	Willingness to human papillomavirus (HPV) vaccination and influencing factors among male and female university students in China	Journal of medical virology	Online	Multi-regions	after 2016	Adult College Student	7440	7335	7335	4409	8	1	1	1	1	1	0	1	0	0	1	1
										Male			3570	3201
										Female			3765	1208
25	2022	English		Haiying Pan	Factors influencing HPV vaccination willingness among men who have sex with men in China：a structural equation modeling analysis	Human vaccines & immunotherapeutics	Online	Multi-regions	2021.6	MSM	1477	889	889	736	7	1	1	1	1	0	0	1	0	0	1	1
26	2021	English		Wei He	Analysis of HPV Vaccination Willingness amongst HIV-Negative Men Who Have Sex with Men in China	Vaccines	Online	Sichuan province, Chongqing	after 2018	MSM	442	406	406	350	8	1	1	1	1	1	0	1	0	0	1	1
27	2021	English		Shangying Hu	A nationwide post-marketing survey of knowledge, attitude and practice toward human papillomavirus vaccine in general population：Implications for vaccine roll-out in mainland China	Vaccine	Mix	Multi-regions	2019.4.11-27	Adult (18-45)	-	5000	4888	3740	7	1	1	1	1	0	1	0	0	0	1	1
										Male			988	671
										Female			3900	3069
28	2021	English		Yu Ma	Human papillomavirus vaccination coverage and knowledge, perceptions and influencing factors among university students in Guangzhou, China	Human vaccines & immunotherapeutics	Online	Guangzhou-Guangdong province	2018.10-12	College Student (20-26)	5414	5307	5143	1156	8	1	1	1	1	1	1	0	0	0	1	1
29	2021	English		Mingyu Si	Willingness to Accept Human Papillomavirus Vaccination and its Influencing Factors Using Information-Motivation-Behavior Skills Model：A Cross-Sectional Study of Female College Freshmen in Mainland China	Cancer control : journal of the Moffitt Cancer Center	Online	Multi-regions	2020.2.21-4.30	Female College Student	3968	3867	3765	1208	10	1	1	1	1	1	1	1	1	0	1	1
30	2020	English		Yulan Lin	HPV vaccination intent and willingness to pay for 2-,4-, and 9-valent HPV vaccines：A study of adult women aged 27-45 years in China	Vaccine	Online	Fujian province	2019.5.12-6.8	Female	-	2339	2339	1368	7	1	1	1	1	0	1	0	0	0	1	1
31	2020	English		Si Qin	Acceptability of vaccination against human papillomavirus among women aged 20 to 45 in rural Hunan Province, China：A cross-sectional study	Vaccine	Offline	Hunan province	2018.7-9	Female (20-45)	2179	2101	2101	1230	10	1	1	1	1	1	1	1	1	0	1	1
32	2020	English		Shuai Wang	Do Male University Students Know Enough About Human Papillomavirus (HPV) to Make Informed Decisions About Vaccination?	Medical science monitor : international medical journal of experimental and clinical research	Online	Beijing, Tianjin, Hebei province	2018.9-12	Male college student	-	1274	1274	493	6	1	1	1	1	0	0	0	0	0	1	1
33	2020	English		Dingyun You	Human Papillomavirus (HPV) Vaccine Uptake and the Willingness to Receive the HPV Vaccination among Female College Students in China：A Multicenter Study	Vaccines	Online	Multi-regions	2019.4-9	Female College Student	-	4220	3757	2010	7	1	1	1	1	0	1	0	0	0	1	1
34	2019	English		Yulan Lin	Factors influencing intention to obtain the HPV vaccine and acceptability of 2-, 4- and 9-valent HPV vaccines:Factors influencing intention to obtain the HPV vaccine and acceptability of 2-, 4- and 9-valent HPV vaccines	Vaccine	Online	Fujian province	2019.5.13-24	Female College Student	-	997	997	550	6	1	1	1	1	0	0	0	0	0	1	1
.
